# Supplementary material
Source: PubMed Central journal article supplement (PMC2683113)
Supplement: 0811599106_0811599106SI.pdf [file 0811599106_0811599106SI.pdf]

# Supporting Information

Rooney et al. 10.1073/pnas.0811599106

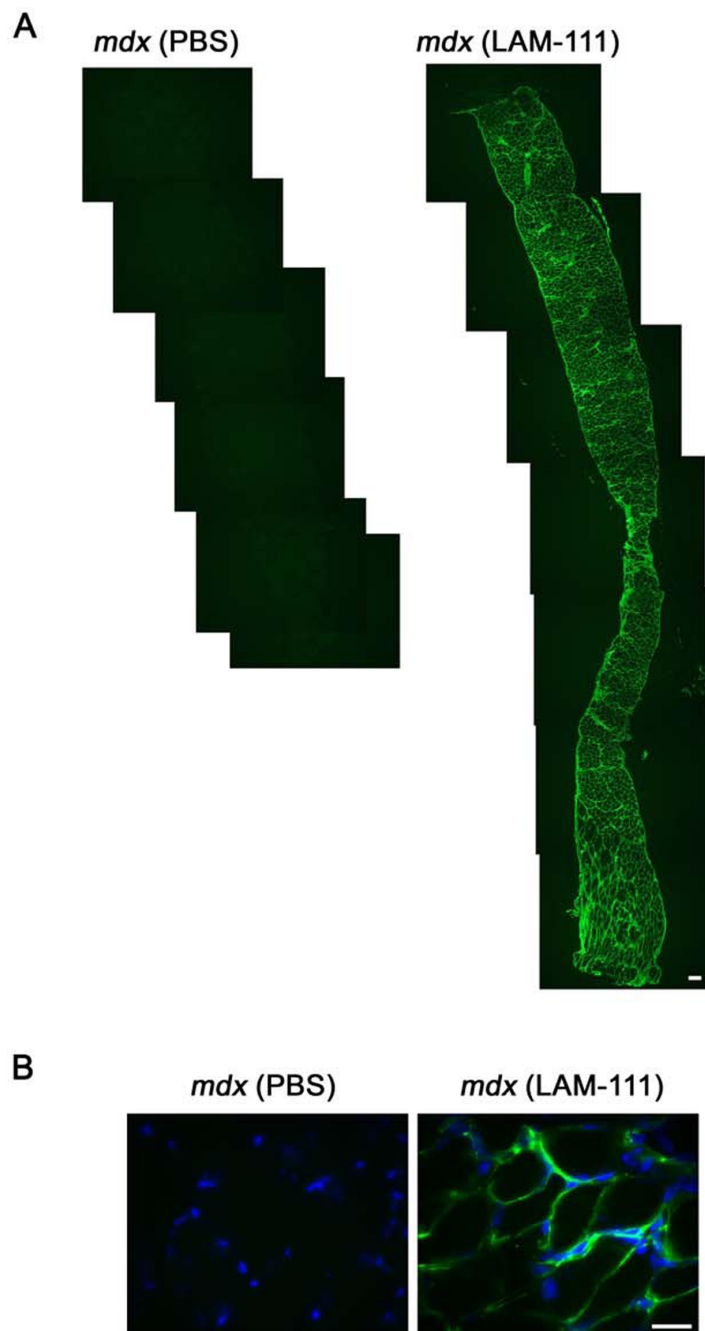

**Fig. S1.** Laminin-111 protein can be systemically delivered to the diaphragm of *mdx* mice. (A) Immunofluorescence reveals i.p. injected laminin-111 protein is detected throughout the diaphragm of *mdx* mice. (Scale bar: 100  $\mu\text{m}$ .) (B) Alexa488-labeled laminin-111 injected i.p. results in delivery of the labeled exogenous protein to the diaphragm of *mdx* mice. (Scale bar: 20  $\mu\text{m}$ .)
